# Supplementary material for: How Do Novel M-Rootstock (Vitis Spp.) Genotypes Cope with Drought?
Source: PubMed Central journal article supplement (PMC7603061; doi:10.3390/plants9101385), 2020-10-17
Supplement: plants-09-01385-s001.pdf [file plants-09-01385-s001.pdf]

**Table S1.** Average values and standard error of physiological parameters measured for 12 own-rooted grapevine rootstocks under both well-watered (80% SWC; soil water content) and water-stressed (20% SWC) conditions.

| Parameter      | SWC [%] | 1103P       | 110R          | 140Ru         | 161-49C       | 41B           | 420A          | K5BB          | M1            | M3            | M4            | Schwarzmann   | SO4           |
|----------------|---------|-------------|---------------|---------------|---------------|---------------|---------------|---------------|---------------|---------------|---------------|---------------|---------------|
| E              | 80      | 1.61 ± 0.24 | 2.56 ± 0.49   | 1.49 ± 0.19   | 1.74 ± 0.49   | 3.46 ± 0.25   | 0.98 ± 0.2    | 2.66 ± 0.41   | 1.78 ± 0.35   | 1.44 ± 0.17   | 1.71 ± 0.18   | 2.39 ± 0.37   | 2.41 ± 0.29   |
|                | 50      | 1.35 ± 0.19 | 2.23 ± 0.33   | 1.1 ± 0.36    | 1.68 ± 0.47   | 2.45 ± 0.35   | 1.28 ± 0.28   | 1.35 ± 0.38   | 0.75 ± 0.12   | 2.78 ± 1.3    | 1.2 ± 0.55    | 0.93 ± 0.09   | 2.2 ± 0.64    |
|                | 20      | 0.55 ± 0.05 | 0.78 ± 0.06   | 1.38 ± 0.19   | 0.38 ± 0.09   | 1.38 ± 0.48   | 1.03 ± 0.23   | 0.67 ± 0.15   | 0.85 ± 0.14   | 0.78 ± 0.19   | 0.88 ± 0.15   | 0.48 ± 0.14   | 0.78 ± 0.14   |
| Gs             | 80      | 104 ± 25    | 84 ± 7        | 65 ± 6        | 83 ± 31       | 159 ± 19      | 52 ± 7        | 70 ± 14       | 53 ± 10       | 93 ± 12       | 85 ± 8        | 164 ± 70      | 122 ± 20      |
|                | 50      | 116 ± 15    | 192 ± 48      | 75 ± 28       | 108 ± 38      | 173 ± 37      | 75 ± 18       | 113 ± 40      | 45 ± 9        | 275 ± 140     | 91 ± 40       | 57 ± 6        | 165 ± 47      |
|                | 20      | 30 ± 3      | 31 ± 2        | 60 ± 8        | 15 ± 3        | 75 ± 26       | 41 ± 10       | 24 ± 5        | 41 ± 6        | 42 ± 12       | 36 ± 7        | 24 ± 9        | 37 ± 7        |
| Pn             | 80      | 5.23 ± 1.13 | 5.1 ± 0.15    | 4.13 ± 1.15   | 3.53 ± 0.89   | 5.63 ± 0.34   | 3.33 ± 0.37   | 2.23 ± 0.3    | 3.03 ± 0.62   | 4.03 ± 0.41   | 4.23 ± 0.18   | 3.6 ± 0.75    | 5.6 ± 0.61    |
|                | 50      | 4.28 ± 0.64 | 6.68 ± 1.64   | 3.8 ± 0.69    | 4.03 ± 1.08   | 5.65 ± 1.27   | 2.55 ± 1.28   | 4.65 ± 0.51   | 2.5 ± 0.58    | 2.63 ± 0.45   | 1.63 ± 0.83   | 3.9 ± 0.51    | 4.48 ± 1.1    |
|                | 20      | 2.7 ± 0.4   | 2.93 ± 0.19   | 4.28 ± 0.62   | 0.6 ± 0.32    | 3.08 ± 0.95   | 1.25 ± 0.51   | 1.2 ± 0.67    | 3.13 ± 0.26   | 3.23 ± 0.5    | 2.65 ± 0.29   | 2.13 ± 0.91   | 2.13 ± 0.08   |
| iWUE           | 80      | 50.8 ± 3.45 | 61.55 ± 5.57  | 67.23 ± 22.77 | 56.65 ± 19.73 | 36.53 ± 5.26  | 71.47 ± 11.61 | 37.79 ± 14.44 | 65.48 ± 22.86 | 44.43 ± 6.63  | 50.92 ± 6.94  | 35.83 ± 17.41 | 47.22 ± 6.08  |
|                | 50      | 37 ± 2.85   | 37.51 ± 10.76 | 70.74 ± 18.62 | 46.25 ± 14.52 | 37.77 ± 11.13 | 38.2 ± 14.17  | 66.24 ± 23.96 | 57.93 ± 8.86  | 35.18 ± 20.89 | 33.53 ± 14.86 | 71.02 ± 10.43 | 36.15 ± 10.98 |
|                | 20      | 90.43 ± 7.9 | 94.79 ± 5.21  | 73.14 ± 9.97  | 32.26 ± 15.91 | 59.7 ± 20.23  | 41.12 ± 16.33 | 54.91 ± 28.12 | 84.03 ± 18.38 | 89.85 ± 16.15 | 79.05 ± 11.58 | 70.84 ± 26.69 | 64.04 ± 12.66 |
| Ψ <sub>s</sub> | 80      | 0.27 ± 0.03 | 0.38 ± 0.1    | 0.27 ± 0.03   | 0.39 ± 0.12   | 0.41 ± 0.02   | 0.42 ± 0.11   | 0.4 ± 0.18    | 0.36 ± 0.13   | 0.46 ± 0.12   | 0.31 ± 0.07   | 0.45 ± 0.1    | 0.36 ± 0.11   |
|                | 50      | 0.46 ± 0.14 | 0.44 ± 0.04   | 0.36 ± 0.04   | 0.36 ± 0.04   | 0.57 ± 0      | 0.32 ± 0      | 0.51 ± 0.05   | 0.36 ± 0.04   | 0.44 ± 0.04   | 0.44 ± 0.12   | 0.4 ± 0       | 0.32 ± 0      |
|                | 20      | 0.92 ± 0.13 | 0.86 ± 0.07   | 0.53 ± 0      | 0.46 ± 0.07   | 0.79 ± 0      | 0.46 ± 0.07   | 0.79 ± 0      | 0.73 ± 0.07   | 0.66 ± 0      | 0.66 ± 0      | 0.66 ± 0      | 0.59 ± 0.07   |

**Table S2.** Average values and standard error of gene expression for six genes detected for 12 own-rooted grapevine rootstocks under both well-watered (80% SWC; soil water content) and water-stressed (20% SWC) conditions.

| Gene                       | SWC [%] | 1103P       | 110R         | 140Ru       | 161-49C      | 41B          | 420A         | K5BB         | M1            | M3          | M4          | Schwarzmann | SO4          |
|----------------------------|---------|-------------|--------------|-------------|--------------|--------------|--------------|--------------|---------------|-------------|-------------|-------------|--------------|
| <i>VvABF2</i>              | 80      | 0.95 ± 0.02 | 1.01 ± 0.02  | 1.01 ± 0    | 1 ± 0.09     | 0.99 ± 0.05  | 1.05 ± 0.04  | 0.99 ± 0.03  | 1.12 ± 0.04   | 1.04 ± 0.04 | 0.97 ± 0.12 | 1 ± 0.03    | 0.97 ± 0.12  |
|                            | 50      | 1.16 ± 0.14 | 2.03 ± 0.41  | 2.66 ± 0.2  | 0.89 ± 0.02  | 1.57 ± 0.03  | 1.34 ± 0.12  | 1.59 ± 0.12  | 1.21 ± 0.08   | 0.75 ± 0.04 | 1.45 ± 0.26 | 2.05 ± 0.3  | 1.16 ± 0.09  |
|                            | 20      | 0.96 ± 0.05 | 1.24 ± 0.17  | 1.89 ± 0.13 | 8.86 ± 0.07  | 1.76 ± 0.04  | 1.07 ± 0.08  | 1.13 ± 0.2   | 0.32 ± 0.02   | 3.18 ± 0.47 | 2.26 ± 0.31 | 2.97 ± 0.13 | 0.87 ± 0.05  |
| <i>VvNCED<sub>1</sub></i>  | 80      | 0.99 ± 0.15 | 1.47 ± 0.07  | 1.01 ± 0.06 | 0.98 ± 0.12  | 1.19 ± 0.09  | 0.94 ± 0.08  | 1.07 ± 0     | 1.09 ± 0.04   | 0.92 ± 0.15 | 0.98 ± 0.05 | 0.98 ± 0.11 | 1.02 ± 0.02  |
|                            | 50      | 1.22 ± 0.02 | 33.15 ± 5.09 | 1.71 ± 0.13 | 3.86 ± 0.42  | 13.42 ± 1.57 | 1.93 ± 0.01  | 10.92 ± 3.19 | 37.54 ± 9.66  | 4.44 ± 0.74 | 4.99 ± 0.15 | 0.87 ± 0.04 | 2.94 ± 0.72  |
|                            | 20      | 2.5 ± 0.57  | 21.15 ± 5.1  | 1.31 ± 0.09 | 9.5 ± 1.66   | 2.12 ± 0.4   | 3.69 ± 0.61  | 8.61 ± 1.33  | 64.74 ± 8.19  | 5.5 ± 0.02  | 4.34 ± 0.65 | 4.62 ± 0.49 | 1.93 ± 0.41  |
| <i>VvNCED<sub>2</sub></i>  | 80      | 1 ± 0.14    | 1.11 ± 0.15  | 1.03 ± 0.16 | 1.2 ± 0.29   | 0.98 ± 0.06  | 0.98 ± 0.1   | 0.96 ± 0.08  | 0.95 ± 0.05   | 0.92 ± 0.06 | 1.08 ± 0.03 | 1.08 ± 0.01 | 0.89 ± 0.12  |
|                            | 50      | 0.96 ± 0.01 | 0.87 ± 0.15  | 1.13 ± 0.22 | 16.83 ± 2.13 | 14.3 ± 2.49  | 1.45 ± 0.08  | 15.93 ± 1.78 | 63.72 ± 12.09 | 2.77 ± 0.29 | 2.76 ± 0.11 | 2.81 ± 0.17 | 29.11 ± 5.36 |
|                            | 20      | 2.95 ± 0.21 | 1.54 ± 0.15  | 1.27 ± 0.01 | 29.5 ± 7.4   | 2.82 ± 0.67  | 5.79 ± 1.02  | 13.3 ± 1.95  | 35.18 ± 6.21  | 4.25 ± 0.46 | 4.86 ± 0.76 | 4.21 ± 0.07 | 43.94 ± 9.98 |
| <i>VvPP2C4</i>             | 80      | 0.94 ± 0.07 | 1.03 ± 0.04  | 1 ± 0       | 1.03 ± 0.12  | 0.93 ± 0.06  | 1.04 ± 0.03  | 1.06 ± 0.05  | 1.06 ± 0.04   | 1.03 ± 0.04 | 0.94 ± 0.08 | 1.33 ± 0.29 | 1.08 ± 0.02  |
|                            | 50      | 1.36 ± 0.15 | 3.65 ± 0.47  | 3.14 ± 0.1  | 1.38 ± 0.28  | 2.02 ± 0.2   | 11.72 ± 2.05 | 1.11 ± 0.09  | 0.82 ± 0.02   | 1.05 ± 0.02 | 0.97 ± 0.01 | 1.43 ± 0.06 | 1.68 ± 0.05  |
|                            | 20      | 2.9 ± 0.39  | 2.07 ± 0.28  | 3.59 ± 0.41 | 8.39 ± 0.13  | 5.65 ± 0.09  | 32.46 ± 2.02 | 2.36 ± 0.08  | 0.98 ± 0.11   | 1.15 ± 0.04 | 4.62 ± 1.01 | 6.45 ± 0.32 | 5.11 ± 0.89  |
| <i>VvSnRK2<sub>6</sub></i> | 80      | 0.94 ± 0.03 | 1.01 ± 0.05  | 1 ± 0       | 1.01 ± 0.07  | 1.01 ± 0.05  | 1.02 ± 0.04  | 1 ± 0.02     | 1.1 ± 0.07    | 0.91 ± 0.07 | 1.04 ± 0.04 | 1.01 ± 0.11 | 0.96 ± 0.11  |
|                            | 50      | 1.02 ± 0.1  | 1.11 ± 0.17  | 1.36 ± 0.01 | 0.82 ± 0.09  | 0.93 ± 0.04  | 1.76 ± 0.25  | 1.27 ± 0.16  | 1.47 ± 0.19   | 1.17 ± 0.1  | 0.87 ± 0.06 | 1.97 ± 0.27 | 1.4 ± 0.14   |
|                            | 20      | 1.17 ± 0.06 | 1.57 ± 0.16  | 1.3 ± 0.05  | 0.7 ± 0.02   | 1.32 ± 0.04  | 2.56 ± 0.69  | 0.95 ± 0.03  | 1.29 ± 0.04   | 1.77 ± 0.39 | 1.86 ± 0.19 | 3.26 ± 0.25 | 0.98 ± 0.08  |
| <i>VvZEP</i>               | 80      | 0.91 ± 0.07 | 0.86 ± 0.06  | 0.99 ± 0.1  | 1.05 ± 0.01  | 0.94 ± 0.1   | 1 ± 0.11     | 1.05 ± 0.07  | 1.06 ± 0      | 1 ± 0.02    | 1.1 ± 0.1   | 0.98 ± 0.06 | 1.22 ± 0.03  |
|                            | 50      | 1.36 ± 0.09 | 1.1 ± 0.06   | 1.44 ± 0.04 | 2.39 ± 0.46  | 31.13 ± 8.97 | 1.29 ± 0.11  | 8.38 ± 1.71  | 11.8 ± 0.56   | 2.69 ± 0.26 | 1.3 ± 0.36  | 1.31 ± 0.11 | 2.07 ± 0.4   |
|                            | 20      | 0.86 ± 0.06 | 1.3 ± 0.06   | 1.19 ± 0.01 | 2.18 ± 0.34  | 0.72 ± 0.06  | 1.82 ± 0.25  | 6.79 ± 1.25  | 10.4 ± 0.14   | 4.6 ± 0.6   | 1.2 ± 0.16  | 1.39 ± 0.17 | 1.24 ± 0.31  |

**Table S3.** Standardized canonical discriminant function coefficients for Function 1 and Function 2 at 50 and 20% SWC (soil water content) for gene expression values of six genes detected in 12 own-rooted grapevine rootstocks.

|                 | 50% SWC    |            | 20%SWC     |            |
|-----------------|------------|------------|------------|------------|
|                 | Function 1 | Function 2 | Function 1 | Function 2 |
| <i>VvABF2</i>   | 1.402      | -0.137     | 0.374      | 0.13       |
| <i>VvNCED1</i>  | -1.174     | -1.04      | -1.298     | 0.356      |
| <i>VvNCED2</i>  | 0.733      | 0.767      | 1.203      | 0.346      |
| <i>VvPP2C4</i>  | 0.462      | 0.373      | 0.625      | -0.098     |
| <i>VvSnRK26</i> | -0.828     | 0.354      | 0.592      | 0.548      |
| <i>VvZEP</i>    | 0.924      | -0.207     | 0.686      | 0.531      |

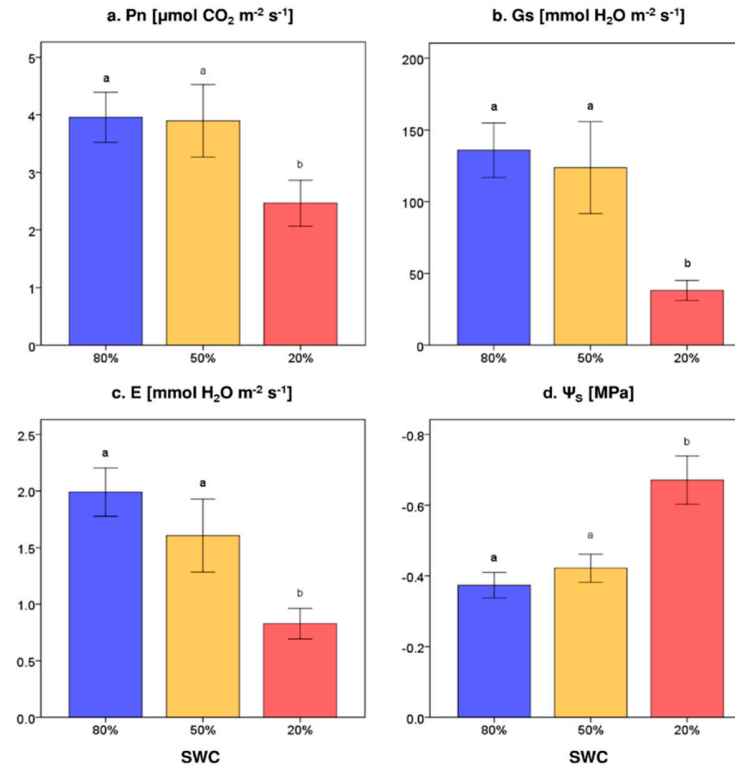

**Figure S1.** Effect of water availability decreasing (50 and 20% SWC; soil water content) in 12 own-rooted grapevine rootstocks on (a) net photosynthesis (Pn), (b) stomatal conductance (Gs), (c) transpiration (E) and (d) stem water potential ( $\Psi_s$ ) in respect to the well-watered condition (80% SWC).  $\Psi_s$  values were normalized on well-watered condition values. Statistical differences among different water conditions for each parameter are defined according to Tukey post-hoc test at  $p$ -value 0.05. Well-watered plants were maintained at 80% SWC and compared to water-stressed plants at 50 and 20% SWC. At 50% SWC, Pn activity amounted to  $3.90 \mu\text{mol CO}_2 \text{ m}^{-2} \text{ s}^{-1}$ , Gs to  $124 \text{ mmol H}_2\text{O m}^{-2} \text{ s}^{-1}$ , E to  $1.61 \text{ mmol H}_2\text{O m}^{-2} \text{ s}^{-1}$  and  $\Psi_s$  to  $-0.42 \text{ MPa}$  (about 113% in comparison to well-watered condition) (Figure 1). Average values of all physiological parameters were not significantly different in comparison with those of the well-watered condition. At 20% SWC, water availability significantly affected all the investigated physiological parameters (Figure 1). Plants reduced all the physiological parameters, showing significant differences in comparison to the well-watered plants: Pn was  $2.47 \mu\text{mol CO}_2 \text{ m}^{-2} \text{ s}^{-1}$  (about 37% less than 80% SWC); Gs was  $38 \text{ mmol H}_2\text{O m}^{-2} \text{ s}^{-1}$  (about 69% less than well-watered condition); E was  $0.83 \text{ mmol H}_2\text{O m}^{-2} \text{ s}^{-1}$  (about 48% less in comparison to well-watered condition);  $\Psi_s$  dropped to  $-0.67 \text{ MPa}$ .
